# Supplementary material
Source: Springer Nature journal article supplement (https://www.springermedizin.de/resource/supplementary/12885_2012_3897_MOESM8_ESM.pdf/9464550)

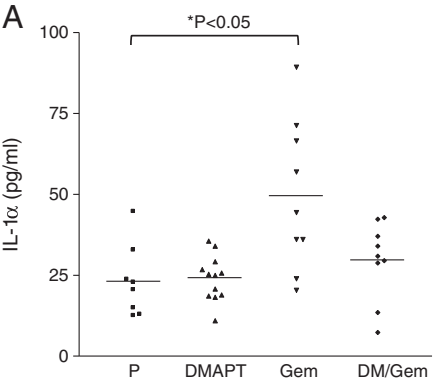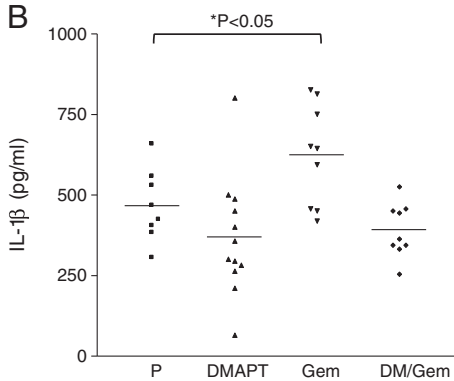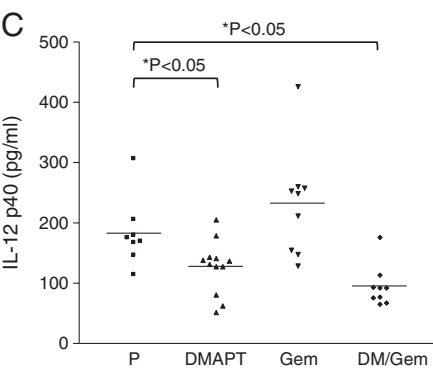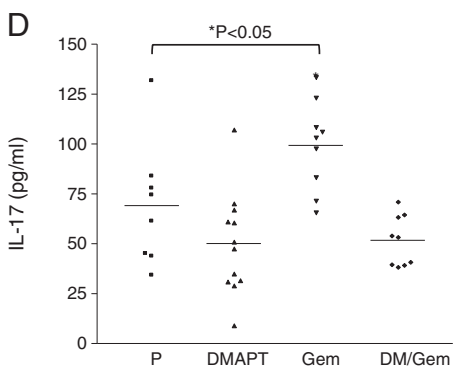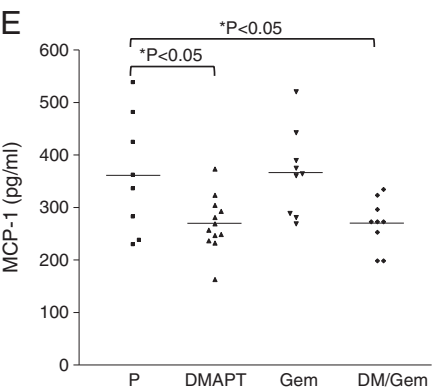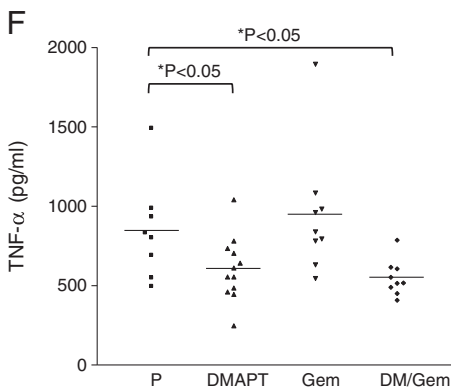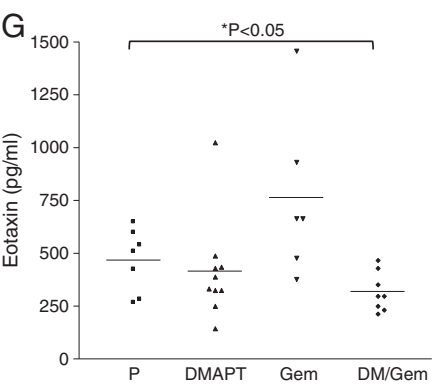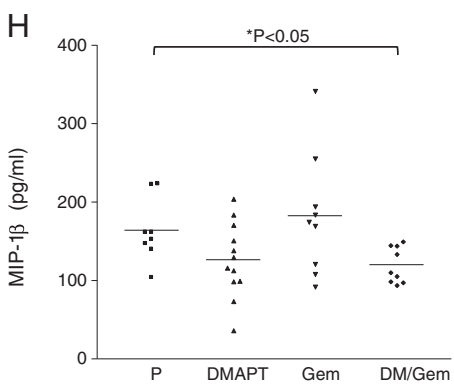

Supplement: MOESM8 [file 9464550]
